# Supplementary material for: Short-Term Foredune Dynamics in Response to Invasive Vegetation Control Actions
Source: MDPI journal article supplement (doi:10.3390/rs16091487), 2024-04-23
Supplement: s1 [file s1]

Supplementary material on “Short-term foredune dynamics in response to invasive vegetation control actions”

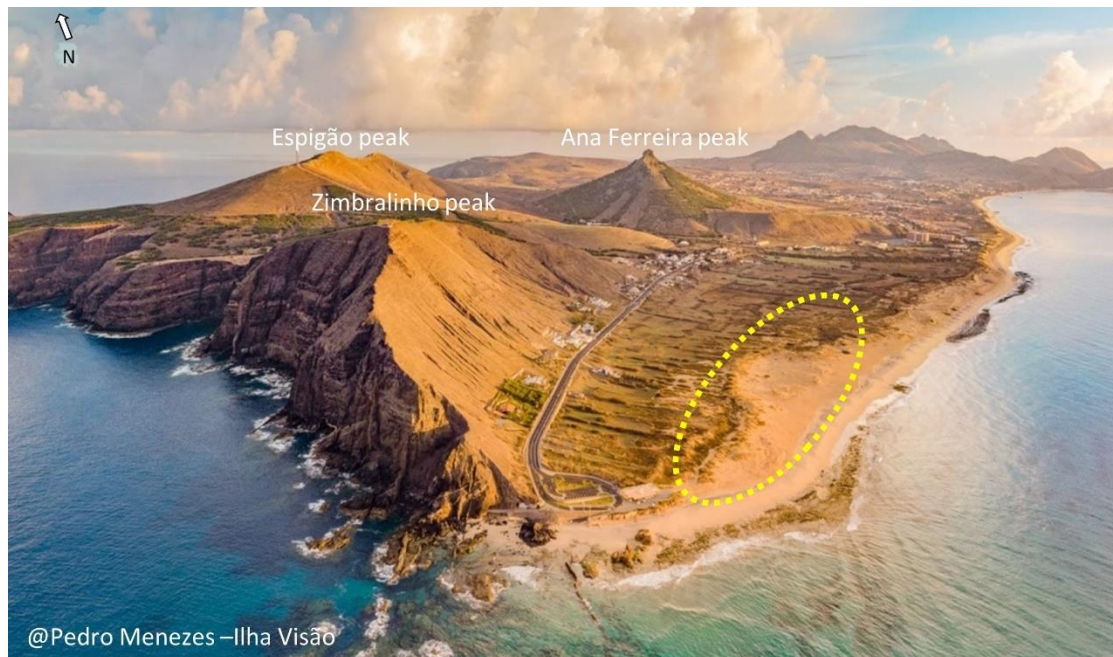

**Figure S 1.** Porto Santo Island, perspective to northeast. Yellow circle: study area (LIFE-Dunas project intervention area). Label refers to main peaks surrounding the study area.

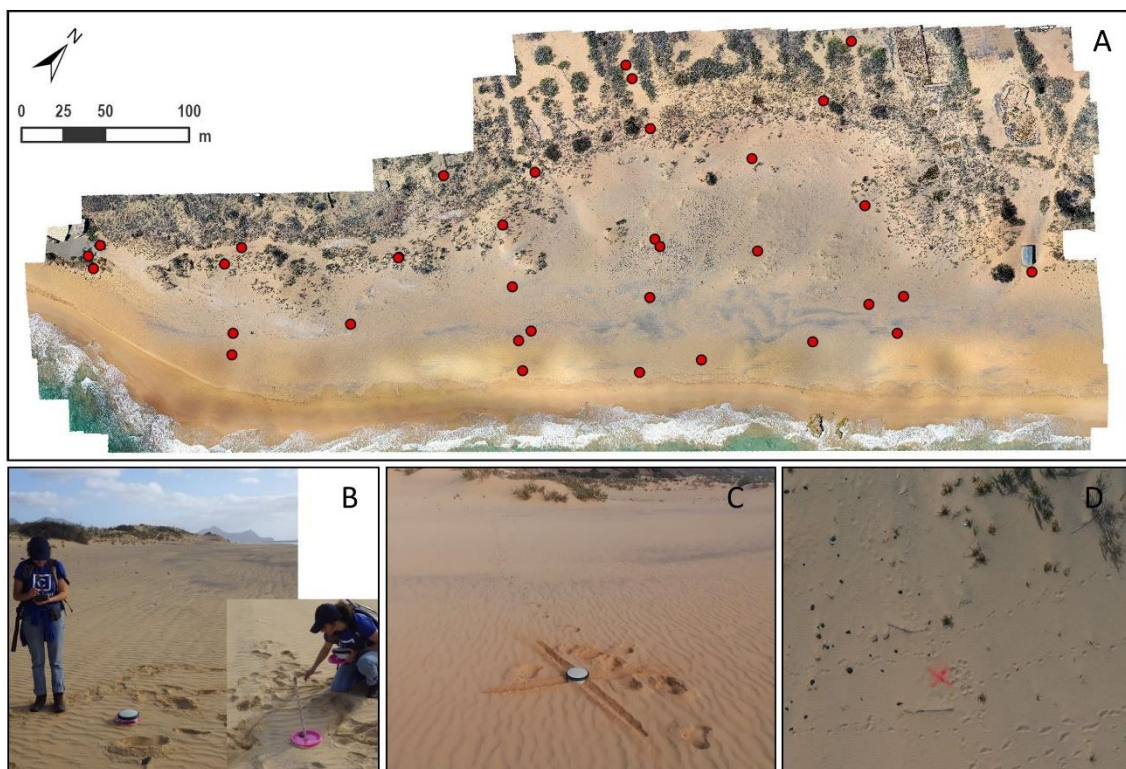

**Figure S 2.** (A) Location of the GCP used in the October 2020 UAV survey. GCP marking and RTK-GPS measurement GCP using (B) colored plastic plates, (C) sand marks or (D) marks with fluorescent biodegradable paint.

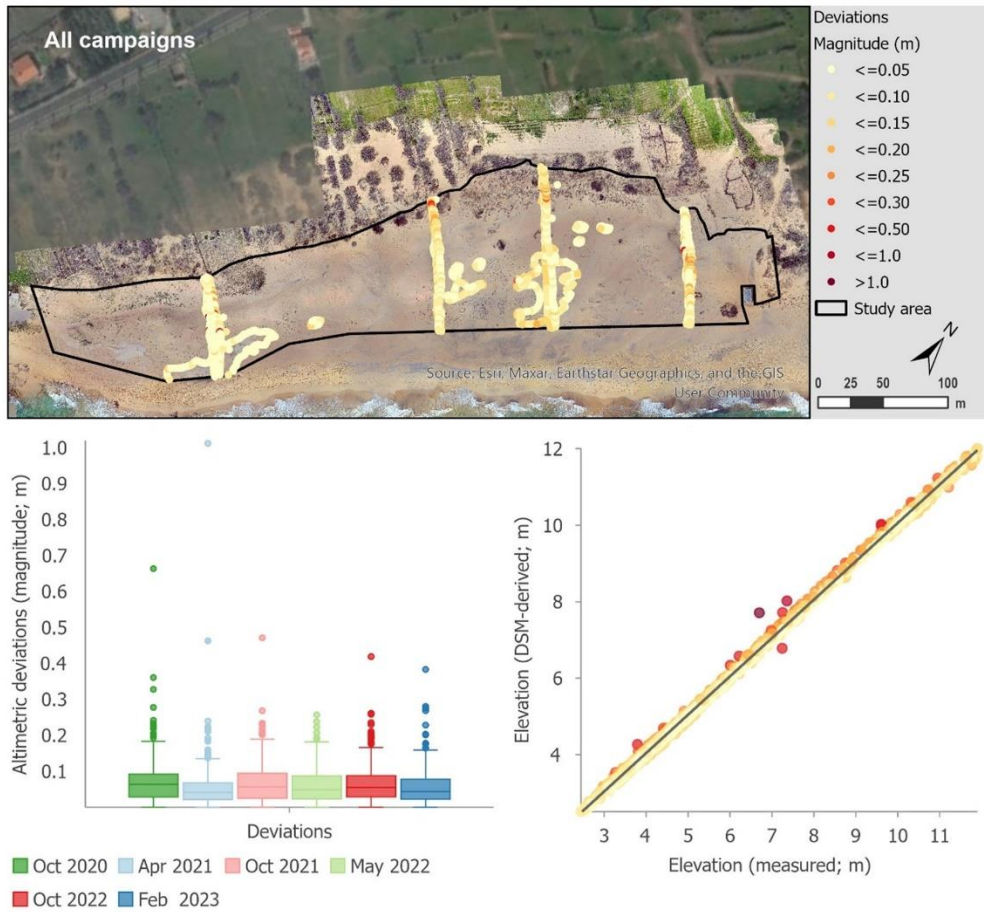

**Figure S 3.** Top: Illustration of the absolute altimetric deviations associated with all DSM in the study area over ESRI Basemap and Feb 2023 orthomosaic. Bottom: Box-plot (left) and scatter diagram (right) of altimetric deviations between interpolated (DSM) and measured (RTK-GPS) homologous points.

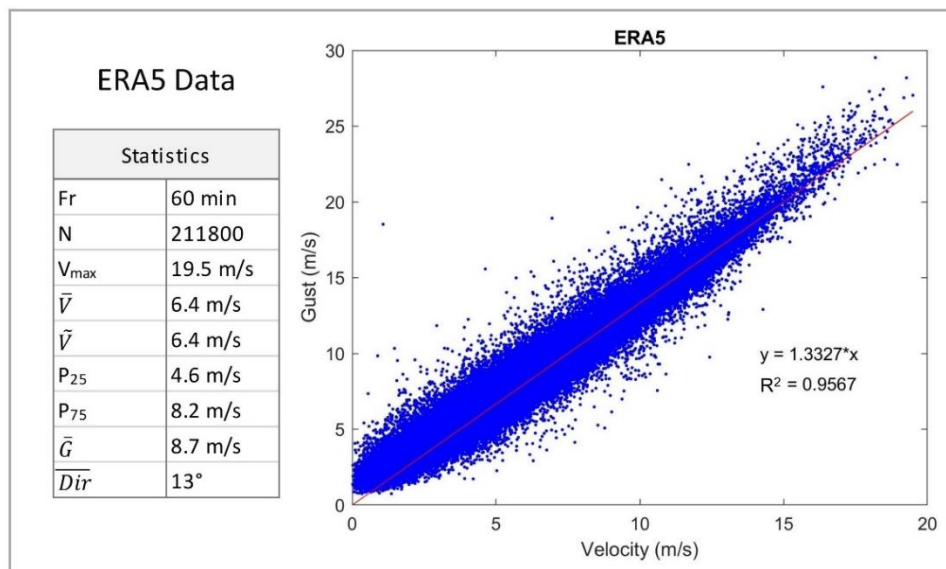

**Figure S 4.** Wind data (between 1999 and Feb. 2023). Left - wind statistics: Fr (frequency of records); N (number of records); V<sub>max</sub> (maximum velocity);  $\bar{V}$  (mean velocity);  $\tilde{V}$  (median velocity); P<sub>25</sub> (velocity 25<sup>th</sup> percentile); P<sub>75</sub> (velocity 75<sup>th</sup> percentile);  $\bar{G}$  (average gust) and  $\overline{Dir}$  (upwind vectorial mean direction). Right - scatter diagram of wind speed *vs.* gust. In red, linear fit to the data; linear equation and correlation coefficient ( $R^2$ ).



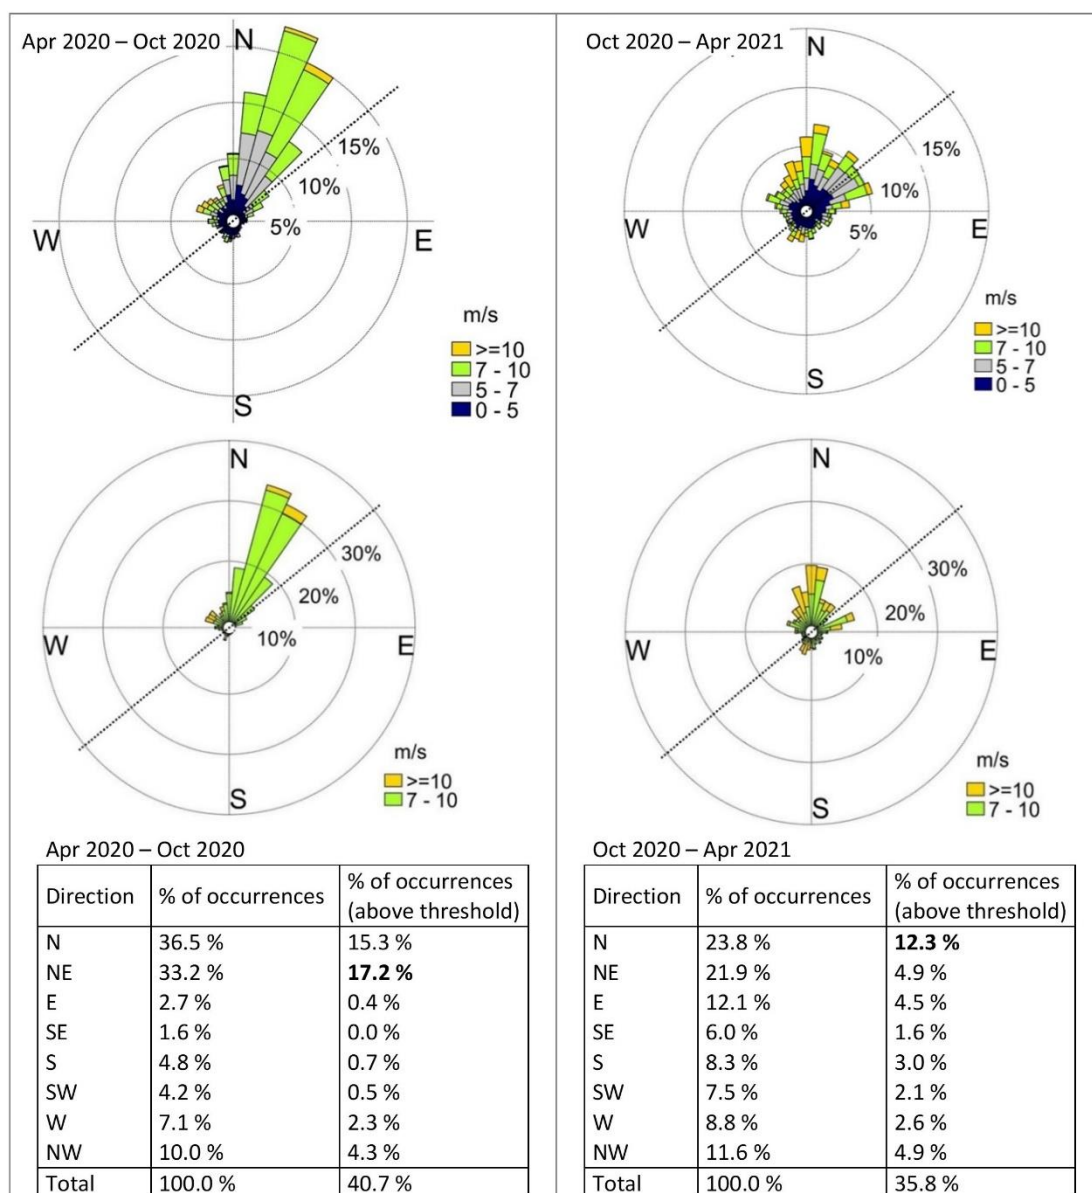

**Figure S 5.** Joint distribution of wind direction and speed between Apr 2020 - Oct 2020 (top) and Oct 2020 – Apr 2021 (bottom). Black dotted line represents coastline direction. Upper diagrams: all records. Lower diagrams: winds above dynamic threshold.

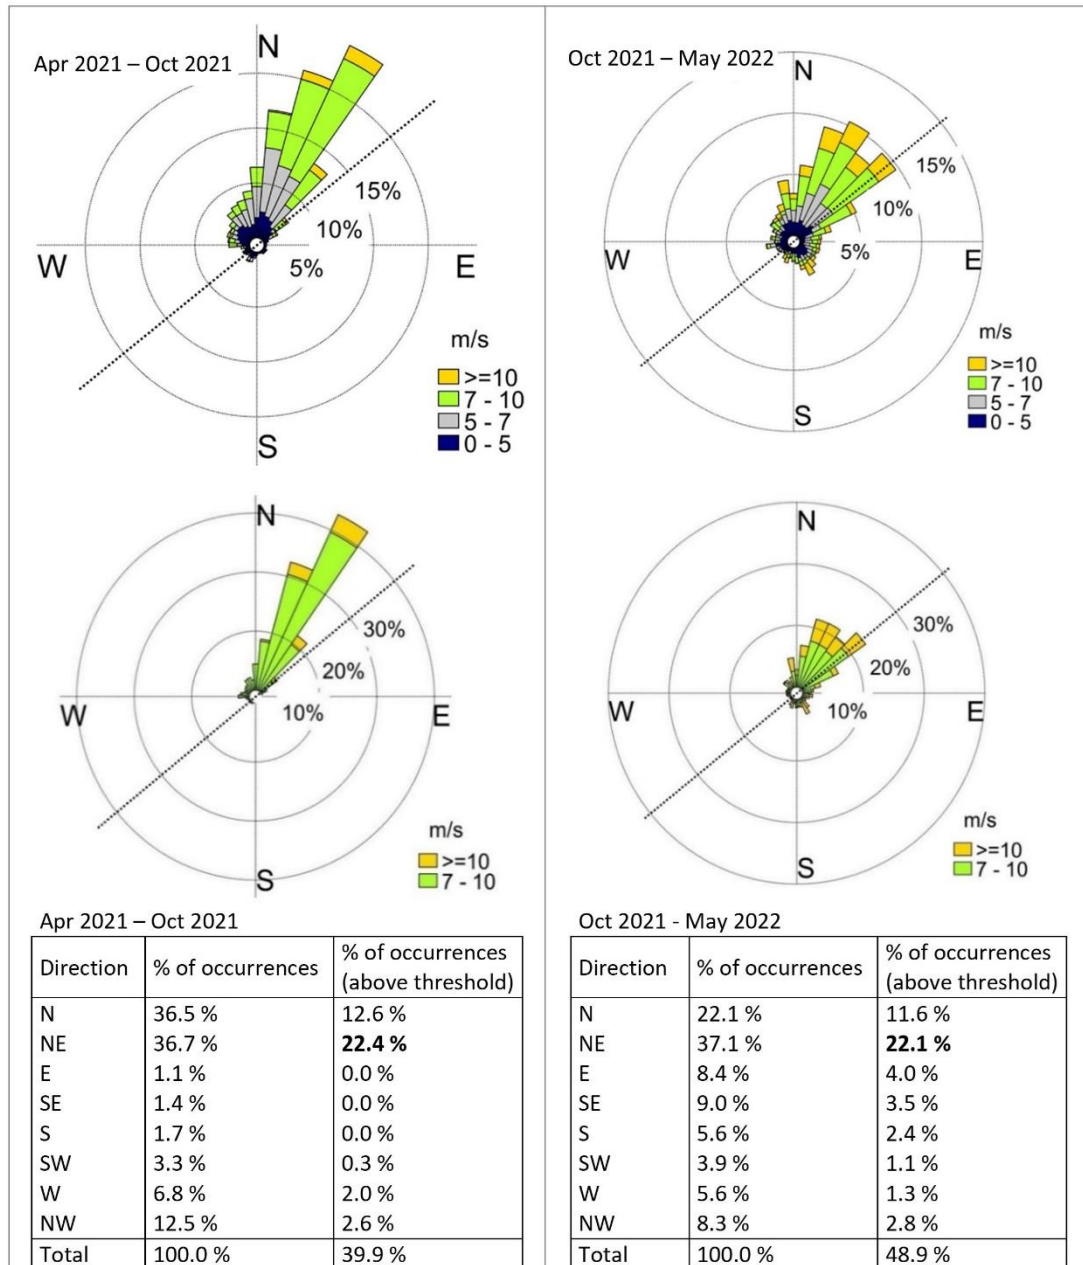

**Figure S 6.** Joint distribution of wind direction and speed between Apr 2021 - Oct 2021 and Oct 2021 – May 2022. Black dotted line represents coastline direction. Upper diagrams: all records. Lower diagrams: winds above dynamic threshold.

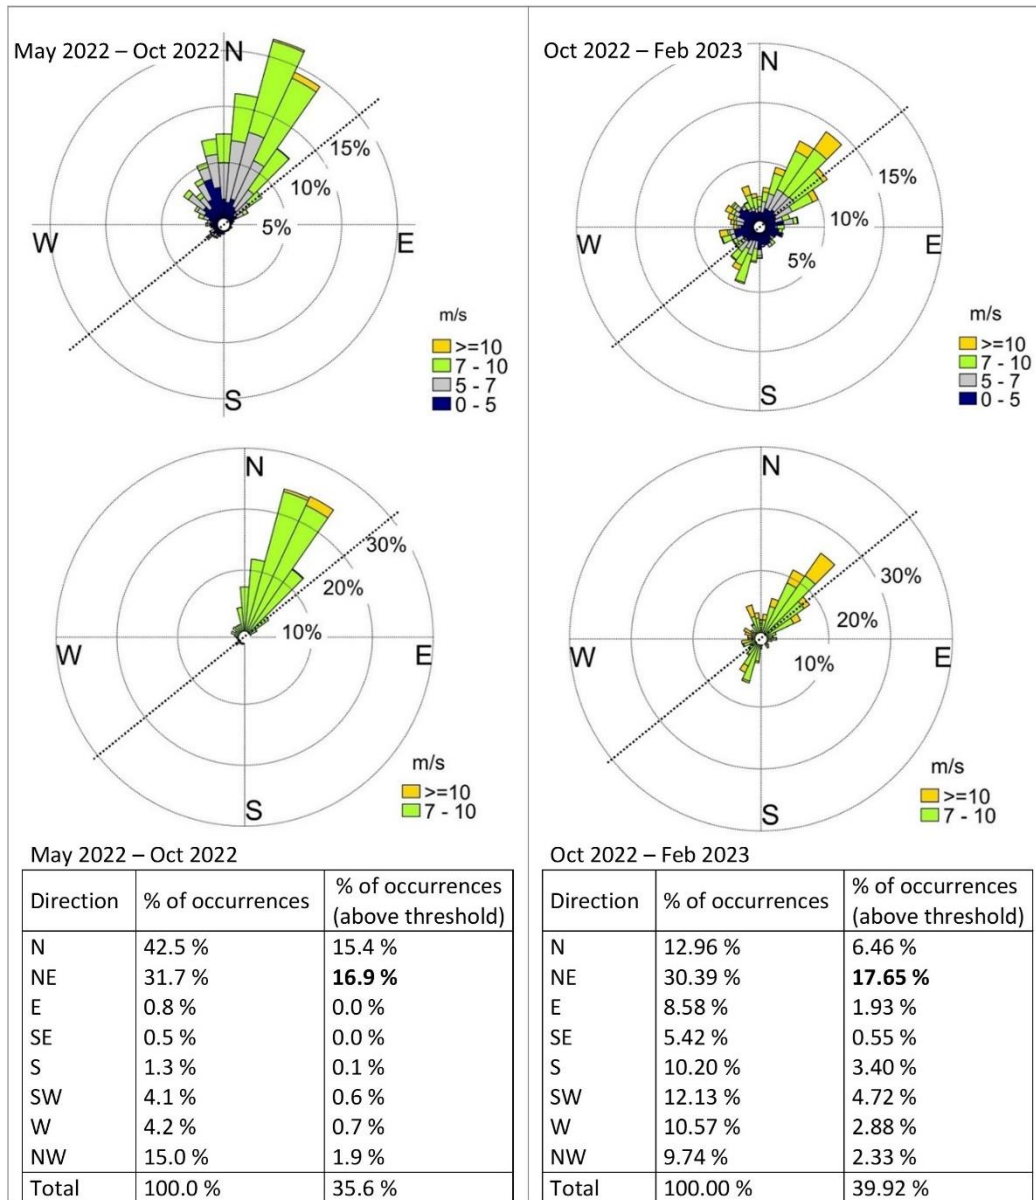

**Figure S 7.** Joint distribution of wind direction and speed between May 2022 – Oct 2022 and Oct 2022 – Feb 2023. Black dotted line represents coastline direction. Upper diagrams: all records. Lower diagrams: winds above dynamic threshold.

**Table S 1.** UAV flight dates; average flight altitude (m); overflown area (m<sup>2</sup>); number of images; number of measured GCP. DSM and orthomosaic resolutions.

| UAV survey  |                      |                                  |        |     | UAV outputs              |                                  |
|-------------|----------------------|----------------------------------|--------|-----|--------------------------|----------------------------------|
| Flight date | Average altitude (m) | Overflown area (m <sup>2</sup> ) | Images | GCP | DSM pixel resolution (m) | Orthomosaic pixel resolution (m) |
| 13/10/2020  | 60                   | 133 000                          | 302    | 27  | 0.025*                   | 0.015                            |
| 07/04/2021  | 50                   | 160 000                          | 1009   | 27  | 0.025                    | 0.015                            |
| 06/10/2021  | 50                   | 112 000                          | 502    | 26  | 0.025                    | 0.015                            |
| 12/05/2022  | 50                   | 155 000                          | 547    | 37  | 0.025                    | 0.015                            |
| 12/10/2022  | 50                   | 123 000                          | 645    | 28  | 0.025                    | 0.015                            |
| 25/02/2023  | 50                   | 145 000                          | 761    | 22  | 0.025                    | 0.015                            |

\* Agisoft automatically yielded a default 0.03 m resolution DSM that was resampled to 0.025 m to match subsequent models.

**Table S 2.** Total area and bare sand area (m<sup>2</sup>) per geomorphologic unit.

| Geomorphologic unit | Area           |                |    |
|---------------------|----------------|----------------|----|
|                     | Total          | Bare sand      |    |
|                     | m <sup>2</sup> | m <sup>2</sup> | %  |
| Foredune            | 24705          | 13708          | 55 |
| Beach               | 1643           | 1485           | 90 |
| Interdune           | 1057           | 542            | 51 |
| Rocky outcrop       | 3012           | 2678           | 89 |
| Second dune         | 5794           | 1521           | 26 |
| Deflation basin     | 13209          | 11763          | 89 |
| Nebka               | 354            | 202            | 57 |
| Total               | 49773          | 31899          | 64 |
